# Supplementary material for: Critical contribution of 3′ non-seed base pairing to the in vivo function of the evolutionarily conserved let-7a microRNA
Source: PubMed Central journal article supplement — Cell Rep. Author manuscript; Available in PMC 2022 Jun 2. (PMC9161110; doi:10.1016/j.celrep.2022.110745), 2022-04-26
Supplement: NIHMS1804350-supplement-1.pdf [file NIHMS1804350-supplement-1.pdf]

Cell Reports, Volume 39

**Supplemental information**

**Critical contribution of 3' non-seed base pairing  
to the *in vivo* function of the evolutionarily  
conserved *let-7a* microRNA**

**Ye Duan, Isana Veksler-Lublinsky, and Victor Ambros**

**Table S5. Genetic alleles generated and *C. elegans* strains used in this study. Related to Figure 2-7, S2, S5**

*let-7a* alleles

| ALLELE | LOCATION/MUTATION                                                                                                                                                                                                                                     | DESCRIPTION                                             | RELATED            |
|--------|-------------------------------------------------------------------------------------------------------------------------------------------------------------------------------------------------------------------------------------------------------|---------------------------------------------------------|--------------------|
| ma341  | chr X: 14744250 <- 14744180:<br>WT: acactgtggatccggTGAGGTAGTAGGTTGTATAGTTggaatattaccaccggTGAACATGCAATTTTCTACCTTACcggagacagaac<br>ma341: acactgtggatccggTGAGGTAGTAGT <b>TAATATTGTA</b> ggaatattaccaccggT <b>GAACAATGTTATG</b> TTCTACCTTACcggagacagaac  | <i>mir-84</i> swap                                      | Fig.2, S2,S5       |
| ma393  | chr X: 14744250 <- 14744180:<br>WT: acactgtggatccggTGAGGTAGTAGGTTGTATAGTTggaatattaccaccggTGAACATGCAATTTTCTACCTTACcggagacagaac<br>ma393: acactgtggatccgg----- <b>TGTATCAGTTCGATATCTGAC</b> cg-----cggagacagaac                                         | pre- <i>let-7</i> swapped by sginPP4A jump board. Null. | Fig.2, 3, 7, S2    |
| ma453  | chr X: 14744250 <- 14744180:<br>WT: acactgtggatccggTGAGGTAGTAGGTTGTATAGTTggaatattaccaccggTGAACATGCAATTTTCTACCTTACcggagacagaac<br>ma453: acactgtggatccggTGAGGTAG <b>GAG</b> TTTGTATAGTTggaatattaccaccggTGAACATGCAAT <b>TTG</b> CTACCTTACcggagacagaac   | U9G                                                     | Fig.3, S2          |
| ma454  | chr X: 14744250 <- 14744180:<br>WT: acactgtggatccggTGAGGTAGTAGGTTGTATAGTTggaatattaccaccggTGAACATGCAATTTTCTACCTTACcggagacagaac<br>ma454: acactgtggatccggTGAGGTAG <b>TGG</b> TTGTATAGTTggaatattaccaccggTGAACATGCAAT <b>AT</b> CTACCTTACcggagacagaac     | A10U                                                    | Fig.3, S2          |
| ma431  | chr X: 14744250 <- 14744180:<br>WT: acactgtggatccggTGAGGTAGTAGGTTGTATAGTTggaatattaccaccggTGAACATGCAATTTTCTACCTTACcggagacagaac<br>ma431: acactgtggatccggTGAGGTAGTAG <b>TG</b> TTGTATAGTTggaatattaccaccggTGAACATGCAAT <b>GT</b> TTCTACCTTACcggagacagaac | G11U                                                    | Fig.3, S2          |
| ma448  | chr X: 14744250 <- 14744180:<br>WT: acactgtggatccggTGAGGTAGTAGGTTGTATAGTTggaatattaccaccggTGAACATGCAATTTTCTACCTTACcggagacagaac<br>ma448: acactgtggatccggTGAGGTAGTAG <b>TTG</b> TATAGTTggaatattaccaccggTGAACATGCAAT <b>TTT</b> CTACCTTACcggagacagaac    | G12U                                                    | Fig.3, S2          |
| ma432  | chr X: 14744250 <- 14744180:<br>WT: acactgtggatccggTGAGGTAGTAGGTTGTATAGTTggaatattaccaccggTGAACATGCAATTTTCTACCTTACcggagacagaac<br>ma432: acactgtggatccggTGAGGTAGTAG <b>GA</b> TGTATAGTTggaatattaccaccggTGAACATGCAAT <b>TTTT</b> CTACCTTACcggagacagaac  | U13A                                                    | Fig.3,4,5 S2,S4,S6 |
| ma433  | chr X: 14744250 <- 14744180:<br>WT: acactgtggatccggTGAGGTAGTAGGTTGTATAGTTggaatattaccaccggTGAACATGCAATTTTCTACCTTACcggagacagaac<br>ma433: acactgtggatccggTGAGGTAGTAG <b>GTA</b> GATAGTTggaatattaccaccggTGAACATGCAAT <b>TTT</b> CTACCTTACcggagacagaac    | U14A                                                    | Fig.3, S2          |
| ma434  | chr X: 14744250 <- 14744180:<br>WT: acactgtggatccggTGAGGTAGTAGGTTGTATAGTTggaatattaccaccggTGAACATGCAATTTTCTACCTTACcggagacagaac<br>ma434: acactgtggatccggTGAGGTAGTAG <b>TTA</b> TATAGTTggaatattaccaccggTGAACATGCAAT <b>TTTT</b> CTACCTTACcggagacagaac   | G15A                                                    | Fig.3, S2          |
| ma449  | chr X: 14744250 <- 14744180:<br>WT: acactgtggatccggTGAGGTAGTAGGTTGTATAGTTggaatattaccaccggTGAACATGCAATTTTCTACCTTACcggagacagaac<br>ma449: acactgtggatccggTGAGGTAGTAG <b>TTG</b> TATAGTTggaatattaccaccggTGAACAT <b>TTCA</b> ATTTTCTACCTTACcggagacagaac   | U16G                                                    | Fig.3, S2          |
| ma450  | chr X: 14744250 <- 14744180:<br>WT: acactgtggatccggTGAGGTAGTAGGTTGTATAGTTggaatattaccaccggTGAACATGCAATTTTCTACCTTACcggagacagaac<br>ma450: acactgtggatccggTGAGGTAGTAG <b>TTT</b> AGTTggaatattaccaccggTGAAC <b>TA</b> GCAATTTTCTACCTTACcggagacagaac       | A17U                                                    | Fig.3, S2          |
| ma435  | chr X: 14744250 <- 14744180:<br>WT: acactgtggatccggTGAGGTAGTAGGTTGTATAGTTggaatattaccaccggTGAACATGCAATTTTCTACCTTACcggagacagaac<br>ma435: acactgtggatccggTGAGGTAGTAG <b>TTGA</b> AGTTggaatattaccaccggTGAAC <b>TTG</b> CAATTTTCTACCTTACcggagacagaac      | U18A                                                    | Fig.3, S2, S3      |
| ma436  | chr X: 14744250 <- 14744180:<br>WT: acactgtggatccggTGAGGTAGTAGGTTGTATAGTTggaatattaccaccggTGAACATGCAATTTTCTACCTTACcggagacagaac<br>ma436: acactgtggatccggTGAGGTAGTAG <b>TTG</b> TATAGTTggaatattaccaccggTGAAC <b>AA</b> TGCAATTTTCTACCTTACcggagacagaac   | A19U                                                    | Fig.3, S2          |
| ma452  | chr X: 14744250 <- 14744180:<br>WT: acactgtggatccggTGAGGTAGTAGGTTGTATAGTTggaatattaccaccggTGAACATGCAATTTTCTACCTTACcggagacagaac<br>ma452: acactgtggatccggTGAGGTAGTAG <b>TTACT</b> TggaatattaccaccggTGAAC <b>G</b> TATGCAATTTTCTACCTTACcggagacagaac      | G20C                                                    | Fig.3, S2          |
| ma456  | chr X: 14744250 <- 14744180:<br>WT: acactgtggatccggTGAGGTAGTAGGTTGTATAGTTggaatattaccaccggTGAACATGCAATTTTCTACCTTACcggagacagaac<br>ma456: acactgtggatccggTGAGGTAGTAG <b>TTACT</b> TggaatattaccaccggTGA <b>ACT</b> TCTATGCAATTTTCTACCTTACcggagacagaac    | U21A                                                    | Fig.3, S2          |
| ma437  | chr X: 14744250 <- 14744180:<br>WT: acactgtggatccggTGAGGTAGTAGGTTGTATAGTTggaatattaccaccggTGAACATGCAATTTTCTACCTTACcggagacagaac<br>ma437: acactgtggatccggTGAGGTAGTAG <b>TTACT</b> TggaatattaccaccggT <b>GA</b> ACTATGCAATTTTCTACCTTACcggagacagaac       | U22A                                                    | Fig.3, S2          |
| ma479  | chr X: 14744250 <- 14744180:<br>WT: acactgtggatccggTGAGGTAGTAGGTTGTATAGTTggaatattaccaccggTGAACATGCAATTTTCTACCTTACcggagacagaac<br>ma479: acactgtggatccggTGAGGTAGTAG <b>TTGGA</b> AGTTggaatattaccaccggTGAAC <b>TTTT</b> CAATTTTCTACCTTACcggagacagaac    | U16G + U18A, equal to <i>ma449ma435</i>                 | Fig.3, S2          |
| ma428  | chr X: 14744250 <- 14744180:<br>WT: acactgtggatccggTGAGGTAGTAGGTTGTATAGTTggaatattaccaccggTGAACATGCAATTTTCTACCTTACcggagacagaac<br>ma428: : acactgtggatccggTGAGGTAGTAG <b>GA</b> TGTAAAGTTggaatattaccaccggTGAAC <b>TTGCA</b> TTTTTCTACCTTACcggagacagaac | U13A + U18A equal to <i>ma432ma435</i>                  | Fig.S2             |
| ma455  | chr X: 14744250 <- 14744180:<br>WT: acactgtggatccggTGAGGTAGTAGGTTGTATAGTTggaatattaccaccggTGAACATGCAATTTTCTACCTTACcggagacagaac<br>ma455: acactgtggatccggTGAGGTAGTAG <b>TTGAG</b> AGTTggaatattaccaccggTGAAC <b>CTG</b> CAATTTTCTACCTTACcggagacagaac     | U18G                                                    | Fig.S2             |
| ma451  | chr X: 14744250 <- 14744180:<br>WT: acactgtggatccggTGAGGTAGTAGGTTGTATAGTTggaatattaccaccggTGAACATGCAATTTTCTACCTTACcggagacagaac<br>ma451: acactgtggatccggTGAGGTAGTAG <b>TTT</b> AGTTggaatattaccaccggTGAAC <b>TA</b> GCAATTTTCTACCTTACcggagacagaac       | U18C                                                    | Fig.S2             |
| ma476  | chr X: 14744250 <- 14744180:<br>WT: acactgtggatccggTGAGGTAGTAGGTTGTATAGTTggaatattaccaccggTGAACATGCAATTTTCTACCTTACcggagacagaac<br>ma476: acactgtggatccggTGAGGTAGTAG <b>TTTACTCA</b> AggaatattaccaccggT <b>GTGATA</b> GCAATTTTCTACCTTACcggagacagaac     | A17U + U18A + A19U + G20C + U21A + U22A                 | Fig.S2             |
| ma477  | chr X: 14744250 <- 14744180:<br>WT: acactgtggatccggTGAGGTAGTAGGTTGTATAGTTggaatattaccaccggTGAACATGCAATTTTCTACCTTACcggagacagaac<br>ma477: acactgtggatccggTGAGGTAGTAG <b>TTATG</b> TTggaatattaccaccggTGAAC <b>ATA</b> GCAATTTTCTACCTTACcggagacagaac      | A17U + U18A + A19U                                      | Fig.S2             |
| ma478  | chr X: 14744250 <- 14744180:<br>WT: acactgtggatccggTGAGGTAGTAGGTTGTATAGTTggaatattaccaccggTGAACATGCAATTTTCTACCTTACcggagacagaac<br>ma478: acactgtggatccggTGAGGTAGTAG <b>TTACTCA</b> AggaatattaccaccggT <b>GTG</b> TATGCAATTTTCTACCTTACcggagacagaac      | G20C + U21A + U22A                                      | Fig.S2             |



## C. elegans strains

| <i>C.elegans</i> : Strain N2                                                                                                                                            | Caenorhabditis Genetics Center | WormBase Strain: N2                                         |
|-------------------------------------------------------------------------------------------------------------------------------------------------------------------------|--------------------------------|-------------------------------------------------------------|
| <i>C.elegans</i> : Strain VT1313 ( <i>mals105 V</i> ; <i>mir-84(n4037) X</i> )                                                                                          | This paper                     | VT1313                                                      |
| <i>C.elegans</i> : Strain VT1367 ( <i>mals105 V</i> )                                                                                                                   | This paper                     | VT1367                                                      |
| <i>C.elegans</i> : Strain VT2692 ( <i>mals105 V</i> ; <i>let-7(n2853) X</i> )                                                                                           | This paper                     | VT2692                                                      |
| <i>C.elegans</i> : Strain VT3439 ( <i>mals105 V</i> ; <i>let-7(ma341) X</i> ) , see Table S5                                                                            | This paper                     | VT3439                                                      |
| <i>C.elegans</i> : Strain VT3455 ( <i>wls51 V</i> )                                                                                                                     | This paper                     | VT3455                                                      |
| <i>C.elegans</i> : Strain VT3460 ( <i>wls51 V</i> ; <i>let-7a(ma341) X</i> ) , see Table S5                                                                             | This paper                     | VT3460                                                      |
| <i>C.elegans</i> : Strain VT3479 ( <i>mals105 V</i> ; <i>let-7(ma341);mir-84(n4037) X</i> ) , see Table S5                                                              | This paper                     | VT3479                                                      |
| <i>C.elegans</i> : Strain VT3585 ( <i>lin-41(ma378) I</i> ; <i>mals105 V</i> ; <i>let-7(ma341) X</i> ) , see Table S5                                                   | This paper                     | VT3585                                                      |
| <i>C.elegans</i> : Strain VT3639 ( <i>lin-41(ma378) I</i> ; <i>mals105 V</i> ) , see Table S5                                                                           | This paper                     | VT3639                                                      |
| <i>C.elegans</i> : Strain VT3645 ( <i>mnDp1(umnlS25) (X;V),+ / +,mals105 V</i> ; <i>let-7(ma393) X</i> ) , see Table S5                                                 | (Duan et al., 2020)            | VT3645                                                      |
| <i>C.elegans</i> : Strain VT3648 ( <i>mnDp1(umnlS25) (X;V),+ / +,mals105 V</i> ; <i>let-7(ma341) X</i> ) , see Table S5                                                 | This paper                     | VT3648                                                      |
| <i>C.elegans</i> : Strain VT3729 ( <i>mnDp1(umnlS25) (X;V),+ / +,mals105 V</i> ; <i>let-7(ma432ma435) X</i> ) , see Table S5                                            | This paper                     | VT3729<br><i>ma432ma435</i> is also labeled as <i>ma428</i> |
| <i>C.elegans</i> : Strain VT3742 ( <i>oxSi1091(Pmex-5::Cas-9(smu-2 introns) unc-119+) II</i> ; <i>mnDp1(umnlS25) (X;V)/+ V</i> ; <i>let-7(ma393) X</i> ) , see Table S5 | This paper                     | VT3742                                                      |
| <i>C.elegans</i> : Strain VT3793 ( <i>mnDp1(umnlS25) (X;V),+ / +,mals105 V</i> ; <i>let-7(ma431) X</i> ) , see Table S5                                                 | This paper                     | VT3793                                                      |
| <i>C.elegans</i> : Strain VT3794 ( <i>mnDp1(umnlS25) (X, see Table S5;V),+ / +,mals105 V</i> ; <i>let-7(ma432) X</i> )                                                  | This paper                     | VT3794                                                      |
| <i>C.elegans</i> : Strain VT3795 ( <i>mnDp1(umnlS25) (X;V),+ / +,mals105 V</i> ; <i>let-7(ma433) X</i> ) , see Table S5                                                 | This paper                     | VT3795                                                      |
| <i>C.elegans</i> : Strain VT3796 ( <i>mnDp1(umnlS25) (X;V),+ / +,mals105 V</i> ; <i>let-7(ma434) X</i> ) , see Table S5                                                 | This paper                     | VT3796                                                      |
| <i>C.elegans</i> : Strain VT3797 ( <i>mals105 V</i> ; <i>let-7(ma435) X</i> ) , see Table S5                                                                            | This paper                     | VT3797                                                      |
| <i>C.elegans</i> : Strain VT3798 ( <i>mals105 V</i> ; <i>let-7(ma436) X</i> ) , see Table S5                                                                            | This paper                     | VT3798                                                      |
| <i>C.elegans</i> : Strain VT3799 ( <i>mals105 V</i> ; <i>let-7(ma437) X</i> ) , see Table S5                                                                            | This paper                     | VT3799                                                      |
| <i>C.elegans</i> : Strain VT3825 ( <i>mnDp1(umnlS25) (X;V),+ / +,mals105 V</i> ; <i>let-7(ma448) X</i> ) , see Table S5                                                 | This paper                     | VT3825                                                      |
| <i>C.elegans</i> : Strain VT3826 ( <i>mnDp1(umnlS25) (X;V),+ / +,mals105 V</i> ; <i>let-7(ma449) X</i> ) , see Table S5                                                 | This paper                     | VT3826                                                      |
| <i>C.elegans</i> : Strain VT3827 ( <i>mals105 V</i> ; <i>let-7(ma450) X</i> ) , see Table S5                                                                            | This paper                     | VT3827                                                      |
| <i>C.elegans</i> : Strain VT3828 ( <i>mals105 V</i> ; <i>let-7(ma451) X</i> ) , see Table S5                                                                            | This paper                     | VT3828                                                      |
| <i>C.elegans</i> : Strain VT3829 ( <i>mals105 V</i> ; <i>let-7(ma452) X</i> ) , see Table S5                                                                            | This paper                     | VT3829                                                      |
| <i>C.elegans</i> : Strain VT3835 ( <i>mals105 V</i> ; <i>let-7(ma453) X</i> ) , see Table S5                                                                            | This paper                     | VT3835                                                      |
| <i>C.elegans</i> : Strain VT3836 ( <i>mals105 V</i> ; <i>let-7(ma454) X</i> ) , see Table S5                                                                            | This paper                     | VT3836                                                      |
| <i>C.elegans</i> : Strain VT3843 ( <i>mals105 V</i> ; <i>let-7(ma455) X</i> ) , see Table S5                                                                            | This paper                     | VT3843                                                      |
| <i>C.elegans</i> : Strain VT3844 ( <i>mals105 V</i> ; <i>let-7(ma456) X</i> ) , see Table S5                                                                            | This paper                     | VT3844                                                      |
| <i>C.elegans</i> : Strain VT3867 ( <i>lin-41(tn1541) I</i> ; <i>oxSi1091 II</i> ; <i>mnDp1(umnlS25) (X;V)/+ V</i> ; <i>let-7(ma432) X</i> ) , see Table S5              | This paper                     | VT3867                                                      |
| <i>C.elegans</i> : Strain VT3868 ( <i>lin-41(tn1541) I</i> ; <i>mnDp1(umnlS25) (X;V)/+ V</i> ; <i>let-7(ma432) X</i> ) , see Table S5                                   | This paper                     | VT3868                                                      |
| <i>C.elegans</i> : Strain VT3873 ( <i>oxSi1091 II</i> ; <i>mnDp1(umnlS25) (X;V)/+ V</i> ; <i>let-7(ma432) X</i> ) , see Table S5                                        | This paper                     | VT3873                                                      |
| <i>C.elegans</i> : Strain VT3874 ( <i>mals105 V</i> ; <i>let-7(ma476) X</i> ) , see Table S5                                                                            | This paper                     | VT3874                                                      |
| <i>C.elegans</i> : Strain VT3875 ( <i>mals105 V</i> ; <i>let-7(ma477) X</i> ) , see Table S5                                                                            | This paper                     | VT3875                                                      |
| <i>C.elegans</i> : Strain VT3876 ( <i>mals105 V</i> ; <i>let-7a(ma478) X</i> ) , see Table S5                                                                           | This paper                     | VT3876                                                      |
| <i>C.elegans</i> : Strain VT3877 ( <i>mnDp1(umnlS25) (X;V),+ / +,mals105 V</i> ; <i>let-7(ma449ma435) X</i> ) , see Table S5                                            | This paper                     | VT3877<br><i>ma449ma435</i> is also labeled as <i>ma479</i> |
| <i>C.elegans</i> : Strain VT3878 ( <i>lin-41(tn1541ma480) I</i> ; <i>let-7(ma432) X</i> ) , see Table S5                                                                | This paper                     | VT3878                                                      |

|                                                                                                                                                     |                                |                                                             |
|-----------------------------------------------------------------------------------------------------------------------------------------------------|--------------------------------|-------------------------------------------------------------|
| <i>C.elegans</i> : Strain VT3879 ( <i>lin-41(tn1541ma480) l</i> ; <i>mals105 V</i> ; <i>let-7(ma432) X</i> ), see Table S5                          | This paper                     | VT3879                                                      |
| <i>C.elegans</i> : Strain VT3945 ( <i>lin-41(tn1541ma501) l</i> ; <i>mals105 V</i> ), see Table S5                                                  | This paper                     | VT3945                                                      |
| <i>C.elegans</i> : Strain VT3949 ( <i>lin-41(tn1541ma480) l</i> ), see Table S5                                                                     | This paper                     | VT3949                                                      |
| <i>C.elegans</i> : Strain VT3950 ( <i>lin-41(tn1541ma480) l</i> ; <i>mals105 V</i> ), see Table S5                                                  | This paper                     | VT3950                                                      |
| <i>C.elegans</i> : Strain VT3954 ( <i>lin-41(tn1541ma501) l</i> ; <i>mnDp1(umnlS25) (X;V),+/-,mals105 V</i> ; <i>let-7(ma393) X</i> ), see Table S5 | This paper                     | VT3954                                                      |
| <i>C.elegans</i> : Strain VT3959 ( <i>lin-41(tn1541) l</i> ; <i>mnDp1(umnlS25) (X;V),+/-,mals105 V</i> ; <i>let-7(ma393) X</i> ), see Table S5      | This paper                     | VT3959                                                      |
| <i>C.elegans</i> : Strain VT3974 ( <i>lin-41(ma501ma545) l</i> ; <i>mals105 V</i> ), see Table S5                                                   | This paper                     | VT3974<br><i>ma501ma545</i> is also labeled as <i>ma511</i> |
| <i>C.elegans</i> : Strain VT3975 ( <i>lin-41(xe11) l</i> ; <i>mals105 V</i> ), see Table S5                                                         | This paper                     | VT3975                                                      |
| <i>C.elegans</i> : Strain VT4009 ( <i>lin-41(ma501ma572) l</i> ; <i>mals105 V</i> ), see Table S5                                                   | This paper                     | VT4009<br><i>ma501ma572</i> is also labeled as <i>ma554</i> |
| <i>C.elegans</i> : Strain VT4058 ( <i>lin-41(ma501ma480) l</i> ; <i>mals105 V</i> ), see Table S5                                                   | This paper                     | VT4058<br><i>ma501ma480</i> is also labeled as <i>ma504</i> |
| <i>C.elegans</i> : Strain VT4060 ( <i>lin-41(ma480) l</i> ; <i>mals105 V</i> ), see Table S5                                                        | This paper                     | VT4060                                                      |
| <i>C.elegans</i> : Strain VT4091 ( <i>lin-41(ma501ma555) l</i> ; <i>mals105 V</i> ), see Table S5                                                   | This paper                     | VT4091<br><i>ma501ma555</i> is also labeled as <i>ma552</i> |
| <i>C.elegans</i> : Strain VT4092 ( <i>lin-41(ma501ma556) l</i> ; <i>mals105 V</i> ), see Table S5                                                   | This paper                     | VT4092<br><i>ma501ma556</i> is also labeled as <i>ma553</i> |
| <i>C.elegans</i> : Strain VT4093 ( <i>lin-41(ma501ma571) l</i> ; <i>mals105 V</i> ), see Table S5                                                   | This paper                     | VT4093<br><i>ma501ma571</i> is also labeled as <i>ma554</i> |
| <i>C.elegans</i> : Strain VT4094 ( <i>lin-41(ma555) l</i> ; <i>mals105 V</i> ), see Table S5                                                        | This paper                     | VT4094                                                      |
| <i>C.elegans</i> : Strain VT4095 ( <i>lin-41(ma556) l</i> ; <i>mals105 V</i> ), see Table S5                                                        | This paper                     | VT4095                                                      |
| <i>C.elegans</i> : Strain VT4123 ( <i>lin-41(ma564) l</i> ; <i>mals105 V</i> ), see Table S5                                                        | This paper                     | VT4123                                                      |
| <i>C.elegans</i> : Strain VT4124 ( <i>lin-41(ma565) l</i> ; <i>mals105 V</i> ), see Table S5                                                        | This paper                     | VT4124                                                      |
| <i>C.elegans</i> : Strain VT4125 ( <i>lin-41(ma566) l</i> ; <i>mals105V</i> ), see Table S5                                                         | This paper                     | VT4125                                                      |
| <i>C.elegans</i> : Strain VT4126 ( <i>oxSi1091 II</i> ; <i>mals105 V</i> ; <i>daf-12(ma498ma567) X</i> ), see Table S5                              | This paper                     | VT4126                                                      |
| <i>C.elegans</i> : Strain VT4128 ( <i>lin-41(tn1541) l</i> ; <i>mals105 V</i> ; <i>daf-12(ma498ma568) X</i> ), see Table S5                         | This paper                     | VT4128                                                      |
| <i>C.elegans</i> : Strain VT4129 ( <i>lin-41(tn1541) l</i> ; <i>mals105 V</i> ; <i>daf-12(ma498) X</i> ), see Table S5                              | This paper                     | VT4129                                                      |
| <i>C.elegans</i> : Strain DG3913 ( <i>lin-41(tn1541) l</i> )                                                                                        | Caenorhabditis Genetics Center | WormBase: DG3913                                            |

**Table S6. Oligonucleotides used in this study.** Related to Figure 2-7, S2, S3, S4, S5, S7

| OLIGONUCLEOTIDES                                                                                                                                                                             | SOURCE     | IDENTIFIER                   |
|----------------------------------------------------------------------------------------------------------------------------------------------------------------------------------------------|------------|------------------------------|
| Alt-R <i>let-7a</i> WT crRNA:<br>TGTGGATCCGGTGAGGTAGT + Alt-R                                                                                                                                | IDT        | AltR_Cas-9_crRNA_let-7_g3    |
| Alt-R <i>let-7a</i> jump board crRNA_1:<br>ATCAGTTCGATATCTGACGG + Alt-R                                                                                                                      | IDT        | AltR_Cas-9_crRNA_INPP4A_1    |
| Alt-R <i>let-7a</i> jump board crRNA_2:<br>TGTATCAGTTCGATATCTGA + Alt-R                                                                                                                      | IDT        | AltR_Cas-9_crRNA_INPP4A_2    |
| Alt-R dpy-10 crRNA as co-CRISPR marker:<br>CTACCATAGGCACCACGAG + Alt-R                                                                                                                       | IDT        | AltR_Cas-9_crRNA_dpy-10_cn64 |
| Alt-R <i>lin-41</i> crRNA_1:<br>CATCGCGTTGAGTGTAGAA + Alt-R                                                                                                                                  | IDT        | AltR_Cas-9_crRNA_lin-41_1    |
| Alt-R <i>lin-41</i> crRNA_2:<br>CAATGGTTCAGAGGCAGAA + Alt-R                                                                                                                                  | IDT        | AltR_Cas-9_crRNA_lin-41_2    |
| Alt-R <i>daf-12</i> crRNA_4:<br>AGAGAGGAATTAAGAGGAAGTTTTAGAGCTATGCT + Alt-R                                                                                                                  | IDT        | AltR_Cas-9_crRNA_daf-12_4    |
| Alt-R CRISPR-Cas-9 tracrRNA                                                                                                                                                                  | IDT        | Cat# 1072533                 |
| <i>let-7a</i> cloning primer reverse:<br>ATTGAAAATCTGTCATTGAGCAA                                                                                                                             | this study | let-7_Donor_R4               |
| <i>let-7a</i> cloning primer forward:<br>GCTCAAGGTTTTCGATCTCTGT                                                                                                                              | this study | let-7_Donor_F4               |
| <i>let-7a</i> HR donor amplifying primer forward:<br>ATAGCACAAAATAAAGAAAAACAAAGAGGTGAAAG                                                                                                     | this study | let-7_SEQ_F4                 |
| <i>let-7a</i> HR donor amplifying primer reverse:<br>AATTTAACAACAAGTACTAATCCATTTTTTCAGGCAAGC                                                                                                 | this study | let-7_SEQ_R4                 |
| <i>let-7a</i> genotyping primer forward:<br>AACGGCTCCATGGATACATTACTCAACAG                                                                                                                    | this study | let-7_SEQ_F5                 |
| <i>let-7a</i> genotyping primer reverse:<br>GGTTTCTGTTTCATATATGAGAAGCGCATCAG                                                                                                                 | this study | let-7_SEQ_R5                 |
| <i>lin-41</i> genotyping primer forward:<br>CATCCATTCATATGGCTCCGCCCC                                                                                                                         | this study | lin-41_SEQ_F3                |
| <i>lin-41</i> genotyping primer reverse:<br>CACTGGGGACATTAGGCAATTGGGGAC                                                                                                                      | this study | lin-41_SEQ_R3                |
| <i>daf-12</i> genotyping primer forward:<br>CGAGGGACGTCCTCCACCGG                                                                                                                             | this study | daf-12_SEQ_F1                |
| <i>daf-12</i> genotyping primer reverse:<br>GGCGTTGGGAGTTGAAAGCTTAAATAG                                                                                                                      | this study | daf-12_SEQ_R1                |
| <i>daf-12</i> genotyping primer forward:<br>GATTCCAAAAGCACTGGGATTACTTAATGTAAG                                                                                                                | this study | daf-12_SEQ_F2                |
| <i>daf-12</i> genotyping primer reverse:<br>AAACTCAAATTATCATGCTTAGTTCTCCATCG                                                                                                                 | this study | daf-12_SEQ_R2                |
| <i>lin-41</i> qRT-PCR primer forward:<br>CGGATACTCGGAATCATCGTTCAG                                                                                                                            | IDT        | lin-41_RTPCR_F               |
| <i>lin-41</i> qRT-PCR primer reverse:<br>GACTGCGAGTCGGTGATTGTTGAAG                                                                                                                           | IDT        | lin-41_RTPCR_R               |
| <i>gpd-1</i> qRT-PCR primer forward:<br>TGCTCCAATGTACGTGGTTGGAG                                                                                                                              | IDT        | gpd-1_RTPCR_F                |
| <i>gpd-1</i> qRT-PCR primer reverse:<br>CGTCATGAGTCCTTCGATGATACCG                                                                                                                            | IDT        | gpd-1_RTPCR_R                |
| <i>lin-41</i> ssDNA donor for <i>ma480</i> :<br>TCAAATTCACCAACTCAAGTATACCTTTTATACATCCGTTCTACACTCAACGCGATGTAATATC<br>GCAATCCCTTTTATACATCCATTCTGCCTCTGAACCATTGAAACCTTC (Ultramer)              | IDT        | N/A                          |
| <i>lin-41</i> ssDNA donor for <i>ma504</i> :<br>CCAACTCAAGTATACCTTTTATACATCCGTTCTACCTCAACGCGATGTAATATCGCAATCCCTTTT<br>TATACATCCATTCTACCTCTGAACCATTGAAACCTTCTCCGTAACCTCCA (Ultramer)          | IDT        | N/A                          |
| <i>lin-41</i> ssDNA donor for <i>ma501</i> :<br>CCAACTCAAGTATACCTTTTATACAACCGTTCTACCTCAACGCGATGTAATATCGCAATCCCTTTT<br>TATACAACCATCTACCTCTGAACCATTGAAACCTTCTCCGTAACCTCCA (Ultramer)           | IDT        | N/A                          |
| <i>lin-41</i> ssDNA donor for <i>ma511</i> :<br>TTGCACCAACTCAAGTATACCTTTTATACATGGGTTCTACCTCAACGCGATGTAATATCGCAATC<br>CCTTTTATACATGGATTCTACCTCTGAACCATTGAAACCTTCTCCGTAAC (Ultramer)           | IDT        | N/A                          |
| <i>lin-41</i> ssDNA donor for <i>ma378</i> :<br>TTCCTCAAATTCACCAACTCAAGTATACCATTAAATTACAGTTCTACACTCAACGCGATGTAAT<br>TATCGCAATCCCTATTAATATTACAATTCTGCCTCTGAACCATTGAAACCTTCTCCGTAAC (Ultramer) | IDT        | N/A                          |

|                                                                                                                                                                                                                                                                                                                                                                                                                                                                                                                                                                                                                                                                                                                                     |         |     |
|-------------------------------------------------------------------------------------------------------------------------------------------------------------------------------------------------------------------------------------------------------------------------------------------------------------------------------------------------------------------------------------------------------------------------------------------------------------------------------------------------------------------------------------------------------------------------------------------------------------------------------------------------------------------------------------------------------------------------------------|---------|-----|
| <i>lin-41</i> ssDNA donor for <i>ma552</i> :<br>TCAAATTGCACCAACTCAAGTATACCTTTTATACAACGGTTCTACCTCAACGCGATGTAATATCG<br>CAATCCCTTTTATACAAGATTCTACCTCTGAACCAATTGAAACCTTCTCCGTACTION (Oligo-<br>Flex)                                                                                                                                                                                                                                                                                                                                                                                                                                                                                                                                    | Genewiz | N/A |
| <i>lin-41</i> ssDNA donor for <i>ma553</i> :<br>TCAAATTGCACCAACTCAAGTATACCTTTTATACAAGCGTTCTACCTCAACGCGATGTAATATCG<br>CAATCCCTTTTATACAAGATTCTACCTCTGAACCAATTGAAACCTTCTCCGTACTION (Oligo-<br>Flex)                                                                                                                                                                                                                                                                                                                                                                                                                                                                                                                                    | Genewiz | N/A |
| <i>lin-41</i> ssDNA donor for <i>ma554</i> :<br>TCAAATTGCACCAACTCAAGTATACCTTTTATACAAGGGTTCTACCTCAACGCGATGTAATATCG<br>CAATCCCTTTTATACAAGATTCTACCTCTGAACCAATTGAAACCTTCTCCGTACTION (Oligo-<br>Flex)                                                                                                                                                                                                                                                                                                                                                                                                                                                                                                                                    | Genewiz | N/A |
| <i>lin-41</i> ssDNA donor for <i>ma525</i> :<br>CAAATTGCACCAACTCAAGTATACCTTTTATTGTTCCGTTCTACCTCAACGCGATGTAATATCGC<br>AATCCCTTTTATTGTTCCATTCTACCTCTGAACCAATTGAAACCTTCTCC (Oligo-Flex)                                                                                                                                                                                                                                                                                                                                                                                                                                                                                                                                                | Genewiz | N/A |
| <i>lin-41</i> ssDNA donor for <i>ma555</i> :<br>TCAAATTGCACCAACTCAAGTATACCTTTTATACAACGGTTCTACCTCAACGCGATGTAATATCG<br>GCAATCCCTTTTATACAAGATTCTGCCTCTGAACCAATTGAAACCTTCTCCGTACTION (Ultra-<br>mer)                                                                                                                                                                                                                                                                                                                                                                                                                                                                                                                                    | IDT     | N/A |
| <i>lin-41</i> ssDNA donor for <i>ma556</i> :<br>TCAAATTGCACCAACTCAAGTATACCTTTTATACAAGCGTTCTACCTCAACGCGATGTAATATCG<br>GCAATCCCTTTTATACAAGATTCTGCCTCTGAACCAATTGAAACCTTCTCCGTACTION (Ultra-<br>mer)                                                                                                                                                                                                                                                                                                                                                                                                                                                                                                                                    | IDT     | N/A |
| <i>lin-41</i> ssDNA donor for <i>ma564</i> :<br>CCTCTTTTCTCAAATTGCACCAACTCAAGTATACCTTTTATACTACCGTTCTACCTCAACGCGAT<br>GTAATATCGCAATCCCTTTTATACTACCAATTCTGCCTCTGAACCAATTGAAACCTTCTCCGTACTION<br>CCCA (Oligo-Flex)                                                                                                                                                                                                                                                                                                                                                                                                                                                                                                                     | Genewiz | N/A |
| <i>lin-41</i> ssDNA donor for <i>ma565</i> :<br>CCTCTTTTCTCAAATTGCACCAACTCAAGTATACCTTTTATAAAACCGTTCTACCTCAACGCGAT<br>GTAATATCGCAATCCCTTTTATAAAACCAATTCTGCCTCTGAACCAATTGAAACCTTCTCCGTACTION<br>CCCA (Oligo-Flex)                                                                                                                                                                                                                                                                                                                                                                                                                                                                                                                     | Genewiz | N/A |
| <i>lin-41</i> ssDNA donor for <i>ma566</i> :<br>CCTCTTTTCTCAAATTGCACCAACTCAAGTATACCTTTTATCAACCGTTCTACCTCAACGCGAT<br>GTAATATCGCAATCCCTTTTATCAACCAATTCTGCCTCTGAACCAATTGAAACCTTCTCCGTACTION<br>CCCA (Oligo-Flex)                                                                                                                                                                                                                                                                                                                                                                                                                                                                                                                       | Genewiz | N/A |
| <i>daf-12</i> dsDNA donor for <i>ma568</i> :<br>CGAGGGACGTCACTCCACGGAGGAATGGACGAGCTCTACAAGTAGACTACTAGAAATCATCT<br>ATTTATGGTGGTGAATACCTCACATCTTGATTCTATATTGCCTCCATCAACAACTCAATCAGCC<br>ACATTTCTTTTACAGTACCTCAACACCTTTCCATATTTATGGTGGTGTACTACCTTTTAAAC<br>CAATTCATCATCTTTTATATTGTTCTTATTGCATTCAACTGGAAATAGCCACTATCATATCACT<br>ATTGCGTATTTCTTTCTTTCTTGCTTATTTCTTGAGACCAGCACCAGAAGATTTTTTCGATG<br>GAGAACTAAGCATGATAATTTGAAATTTCCATTTAAAAAATGCAGGTAATACGGTTAATTCAT<br>CTGCGAGTTGATGTTCCGGTCTCCGGTTTCTATGTTCTACTTCTAATGACTAGAAACCTTTTATCTA<br>ACATCCGGTCTCTATCCCTAATGTACCCAGTAGATATTTTTCCCGAATGATTAACCTCCAG<br>TCAAATATTGATTTGATTTATGGTGGTACTACCTCTTAATCCGTAATACTATCTCAGATTT<br>TCATTGAAAGAACTGGTCCGGAATTATTGAATCATCAGCTAG (fragmentGENE) | Genewiz | N/A |

Figure S1

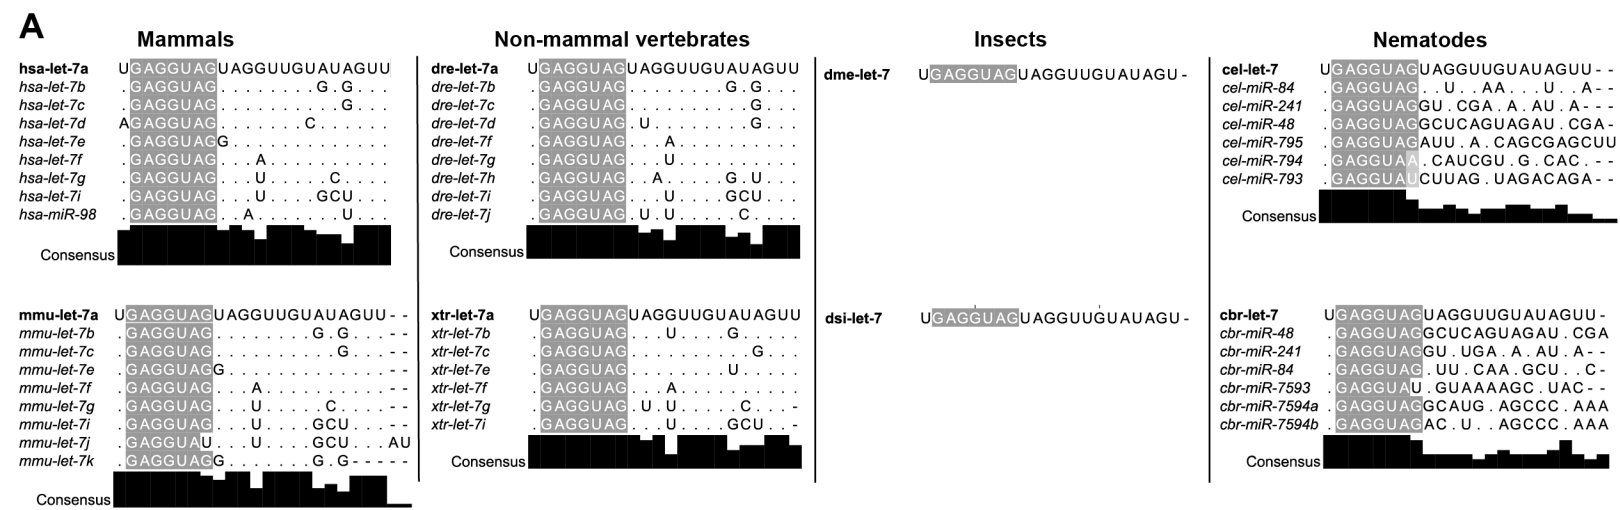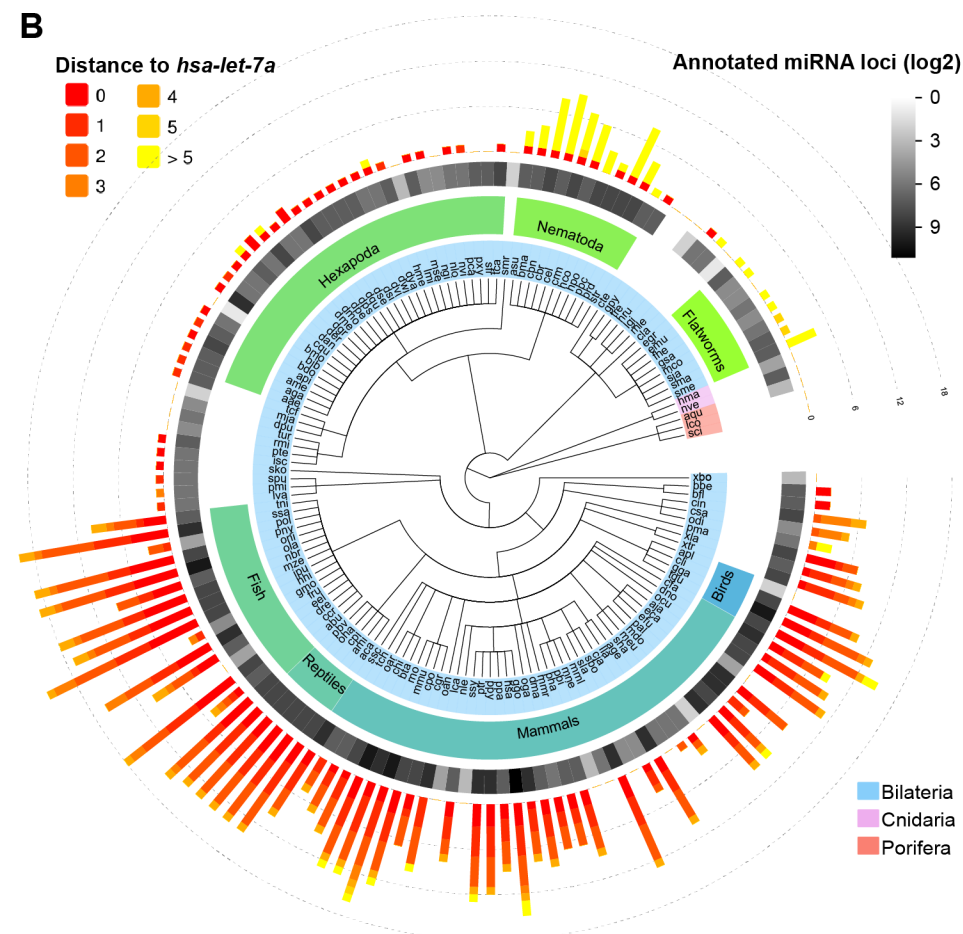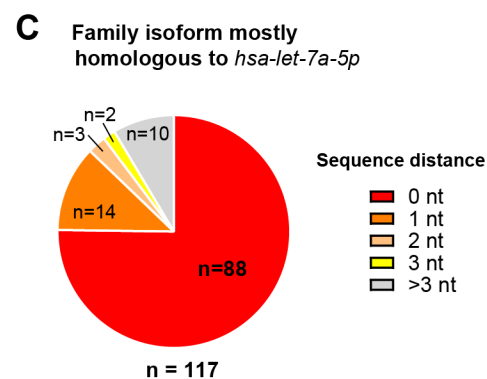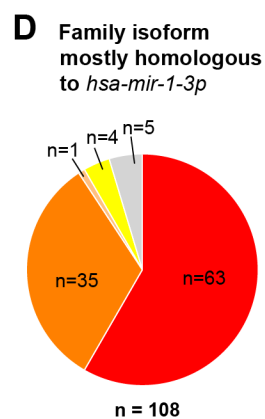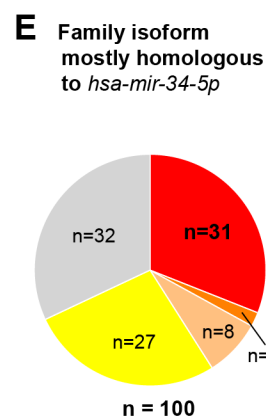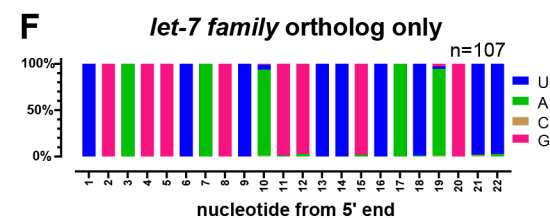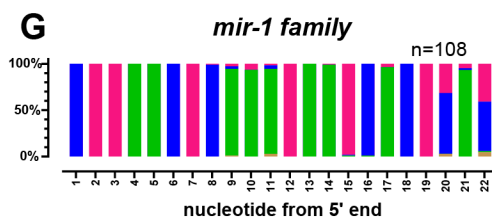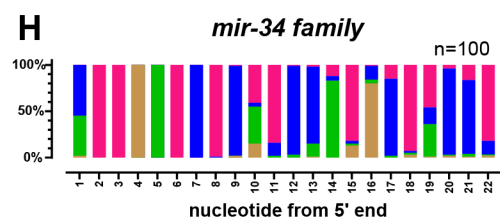



**Figure S1. *let-7a* is distinguishably conserved among bilaterian species.** (Related to **Figure 1**).

**A.** Sequence alignments and consensus of *let-7 family* miRNAs from model organisms including *H. sapiens* (*hsa*), *M. musculus* (*mmu*), *D. rerio* (*dre*), *X. tropicalis* (*xtr*), *D. melanogaster* (*dme*), *D. simulans* (*dsi*), *C. elegans* (*cel*) and *C. briggsae* (*cbr*). Nucleotides identical to *hsa-let-7a-5p* are indicated by dots (.) and gaps in sequence alignment are indicated by dashes (-). *dme* and *dsi* do not have consensus scores because *let-7a* appears singly in these species. Alignments and consensus are scored by JalView (Waterhouse et al., 2009).

**B.** Summary of *let-7 family* miRNAs across animal phylogeny tree which includes all metazoans with *let-7 family* annotation in miRBase v22.1. In the outer circle, bar lengths indicate the number of annotated *let-7 family* isoforms, and bar colors indicate the sequence distances to *hsa-let-7a-5p*. The middle circle indicates the quality of the total miRNA annotation of each species. Note that cases of an apparent absence of *let-7 family* miRNA usually correlate with poor miRNA annotation.

**C-E.** Distributions of sequence distances between *hsa-let-7a-5p* (**C**), *hsa-mir-1-3p* (**D**), *hsa-mir-34-5p* (**E**) and their closest isoforms of each species across bilaterians.

**F.** Nucleotide frequency of the *let-7a family* isoforms closest to *hsa-let-7a-5p*, excluding species without the *let-7a* orthologs (closest *let-7* isoform has > 3 nucleotides different from *hsa-let-7a-5p*).

**G-H.** Nucleotide frequency of *mir-1 family* (**G**) and *mir-34 family* (**H**) isoforms mostly homologous to *hsa-mir-1-3p* (**G**) and *has-mir-34-5p* (**H**).

Figure S2

**A**

|       |      | miRNA                        | passenger                    | kcal/mol |       |             | miRNA                        | passenger                    | kcal/mol |
|-------|------|------------------------------|------------------------------|----------|-------|-------------|------------------------------|------------------------------|----------|
| WT    | +    | (((((.....(((.....)))))))))) | (((((.....(((.....)))))))))) | -24.50   | ma449 | U16G        | (((((.....(((.....)))))))))) | (((((.....(((.....)))))))))) | -23.80   |
| ma453 | U9G  | (((((.....(((.....)))))))))) | (((((.....(((.....)))))))))) | -27.10   | ma450 | A17U        | (((((.....(((.....)))))))))) | (((((.....(((.....)))))))))) | -23.90   |
| ma454 | A10U | (((((.....(((.....)))))))))) | (((((.....(((.....)))))))))) | -25.30   | ma435 | U18A        | (((((.....(((.....)))))))))) | (((((.....(((.....)))))))))) | -23.90   |
| ma431 | G11U | (((((.....(((.....)))))))))) | (((((.....(((.....)))))))))) | -24.50   | ma436 | A19U        | (((((.....(((.....)))))))))) | (((((.....(((.....)))))))))) | -24.10   |
| ma448 | G12U | (((((.....(((.....)))))))))) | (((((.....(((.....)))))))))) | -21.90   | ma452 | G20C        | (((((.....(((.....)))))))))) | (((((.....(((.....)))))))))) | -24.50   |
| ma432 | U13A | (((((.....(((.....)))))))))) | (((((.....(((.....)))))))))) | -24.60   | ma456 | U21A        | (((((.....(((.....)))))))))) | (((((.....(((.....)))))))))) | -24.80   |
| ma433 | U14A | (((((.....(((.....)))))))))) | (((((.....(((.....)))))))))) | -24.90   | ma437 | U22A        | (((((.....(((.....)))))))))) | (((((.....(((.....)))))))))) | -24.90   |
| ma434 | G15A | (((((.....(((.....)))))))))) | (((((.....(((.....)))))))))) | -22.60   | ma341 | mir-84 swap | (((((.....(((.....)))))))))) | (((((.....(((.....)))))))))) | -22.60   |

**B**

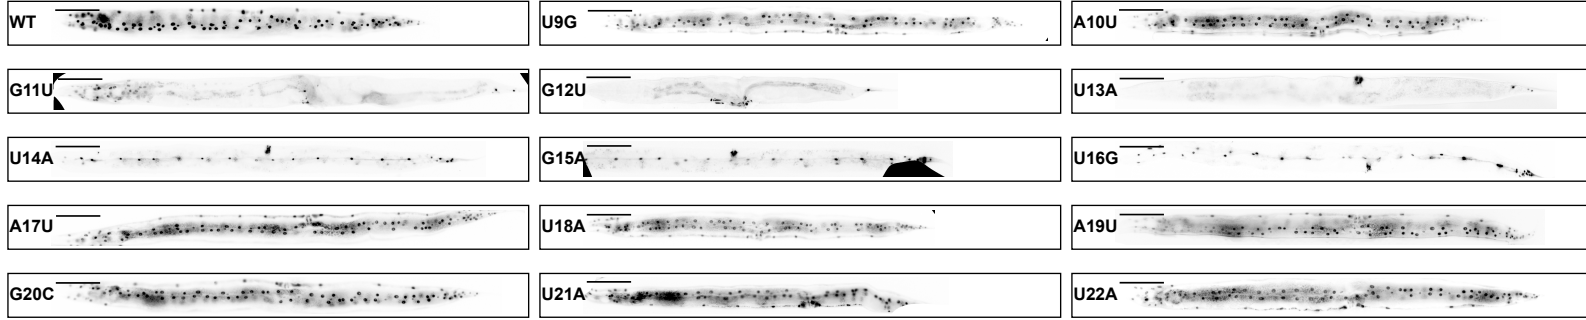

**C**

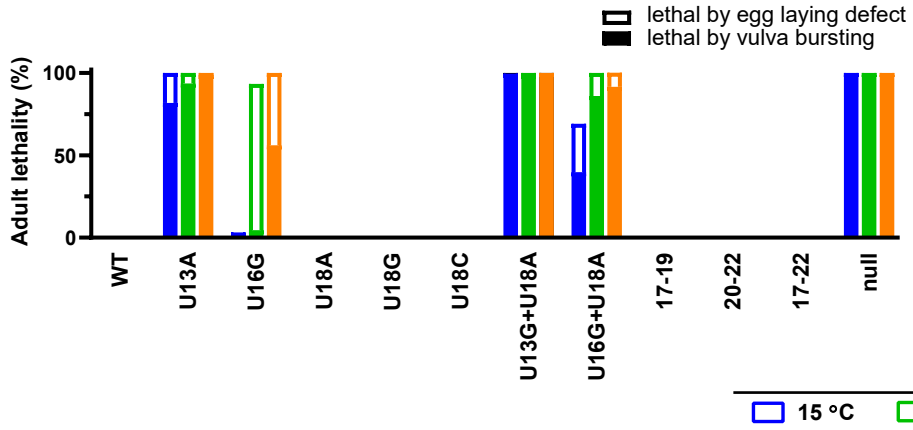

**D**

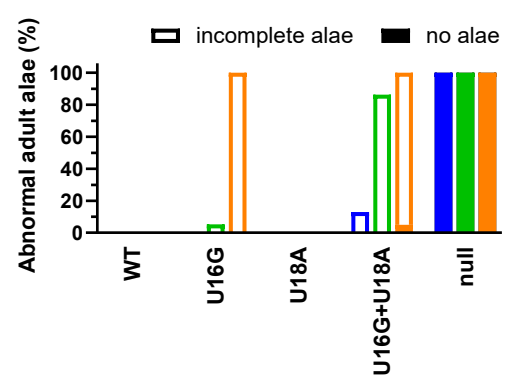

**Figure S2. A phenotypic mutational screen of *let-7a* 3' non-seed region.** (Related to **Figure 3**).

**A.** Dot-bracket notations of optimal secondary structures and the minimum folding free energy of pre-miRNA for *let-7a* mutants (**Fig. 3A**). Secondary structure predictions and free energy were analyzed by RNAfold (Denman, 1993; Kerpedjiev et al., 2015). For each position, the miRNA nucleotide and the corresponding nucleotide in the passenger strand were mutated according to the following criteria (ranked by the order): (1) The resulting nucleotides are identical to the corresponding nucleotides of *let-7(ma341)*; (2) the resulting sequences cause the minimum change to pre-miRNA structure; (3) the resulting sequences cause the minimum change to pre-miRNA folding energy.

**B.** Representative COL-19::GFP patterns for the *let-7a* 3' non-seed mutants, scored by expression of *mals105(col-19::gfp)*. Scale bars, 100  $\mu$ m. Images are processed by ImageJ Fiji (Schindelin et al., 2012).

**C-D.** Synergistic effect between mutations at g17-g22 and the critical non-seed nucleotides at g11-g16. **C.** Vulva integrity phenotypes, reflected by two categories of lethality: bursting of pre-gravid adults (severe), or accumulation of hatched progeny inside the uterus due to egg-laying defects (mild). **D.** Phenotypes in heterochronic pathway based on adult alae phenotypes. The alae phenotypes are categorized as no alae (severe) or incomplete alae (mild). Simultaneously mutating g13 and g18 did not result in enhanced phenotypes compared to mutating g13 alone, likely because the phenotypes of the g13 mutation are already essentially as strong as *let-7(null)*.

Figure S3

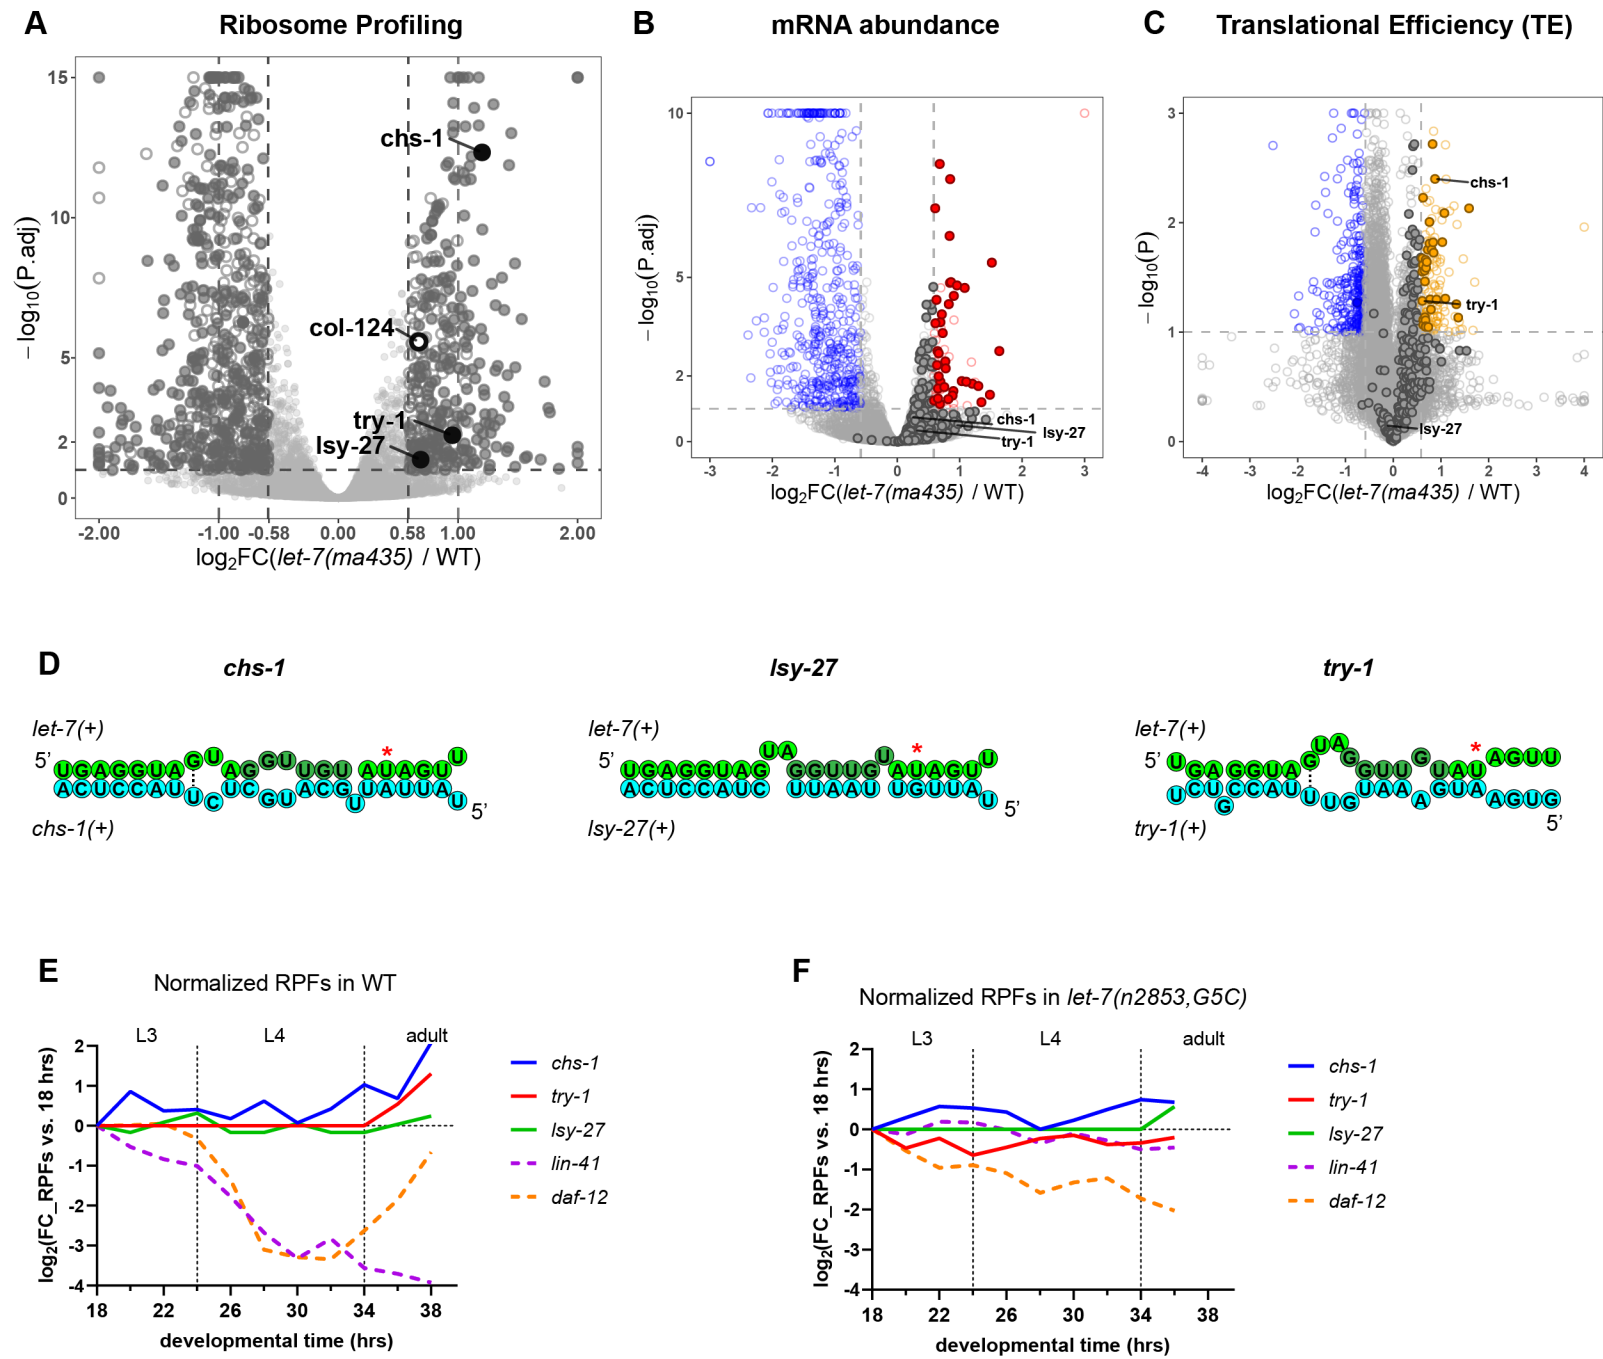

**Figure S3. Molecular phenotypes of *let-7(ma435, U18A)*.** (Related to **Figure 3**).

**A-C.** Differential expression analyses of RPFs (**A**), mRNA abundance (**B**) and TE (**C**) between *let-7(ma435);mals105* and *mals105*. Hollow points indicate developmentally dynamic genes whose perturbation in these experiments could potentially reflect imperfect synchrony between samples (See Figure 5 legend and Star Methods) and not the genotypes; solid points indicate genes likely to be perturbed specifically due to the mutation in **A**. Genes with significantly increased/decreased mRNA ( $FC > |1.5|$  and  $P_{adj} < 0.1$  by DESeq2) are represented by red/blue points in **B**. Genes with significantly increased/decreased TE ( $FC > |1.5|$  and  $P < 0.1$  by t-test) are colored orange/blue in **C**. Genes that contain predicted LCSs with g18 pairing are labeled by gene names in **A**. Solid points in **B-C** represent genes with significantly increased RPFs in ribosome profiling.

**D.** Predicted base-pairing configuration between *let-7a* and the predicted LCSs with g18 pairing. g18 are labeled by red asterisks (\*).

**E-F.** Developmental profiles of the translation of the putative g18 targets in WT (**E**) and *let-7(n2853, G5C)* (**F**) at L3, L4 and young adult stages. Results were analyzed from (Aeschimann et al., 2017) and normalized by the RPFs at 18 hrs. *lin-41* and *daf-12* are used as validated *let-7a* targets which are down-regulated at L4 stages.

Figure S4

**A** *lin-41(+);let-7(+)*

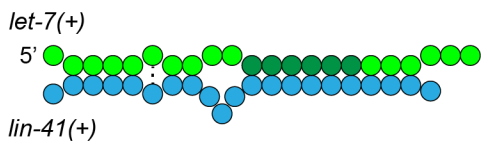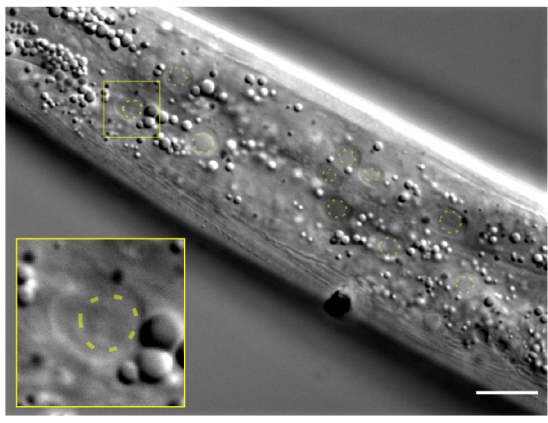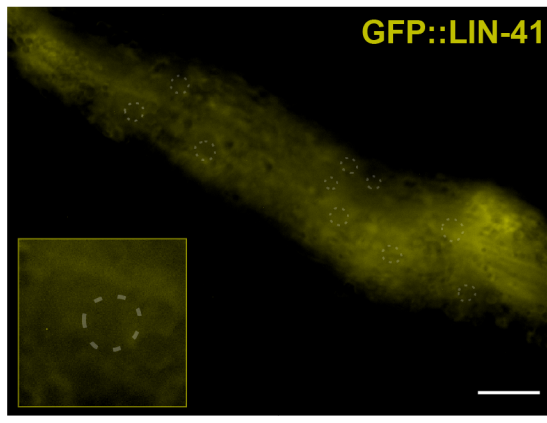

**B** *lin-41(+);let-7(ma432)*

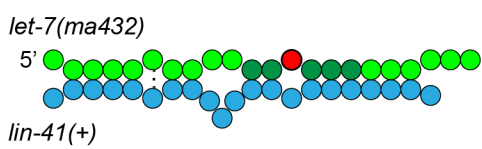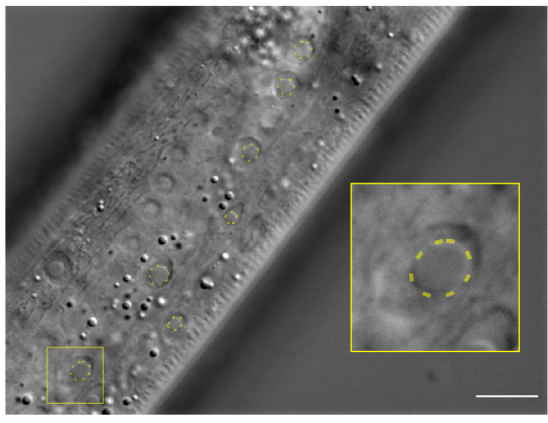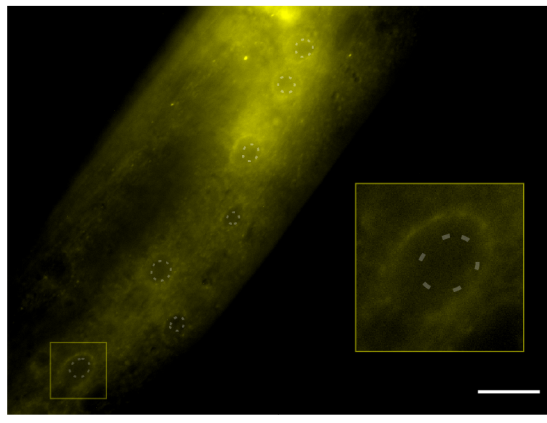

**C** *lin-41(ma480);let-7(ma432)*

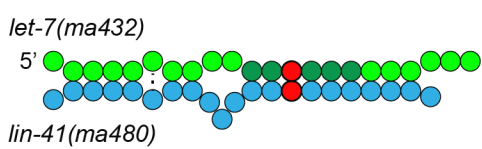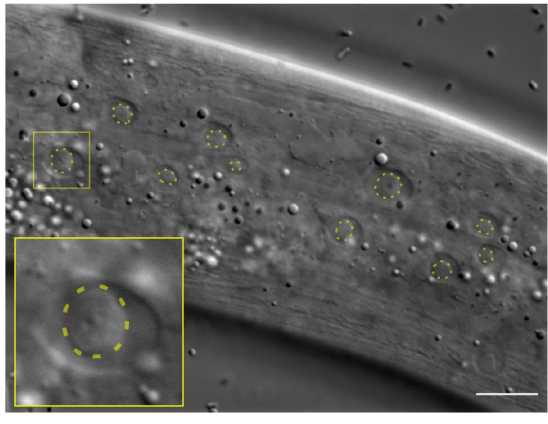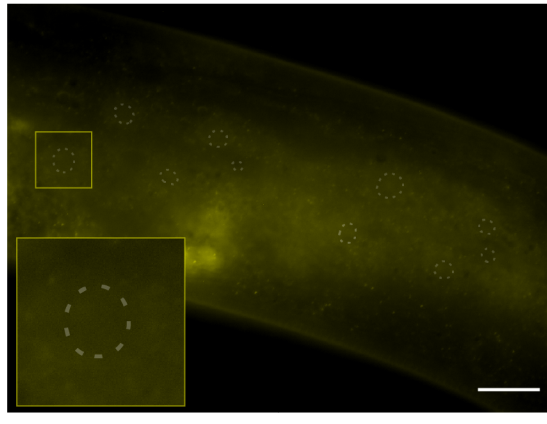

**D** *lin-41(ma480);let-7(+)*

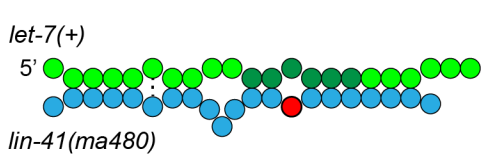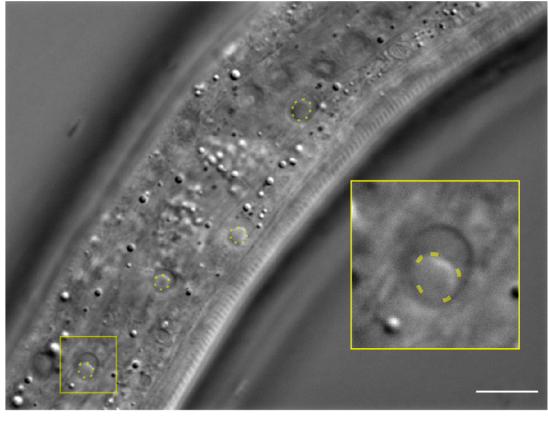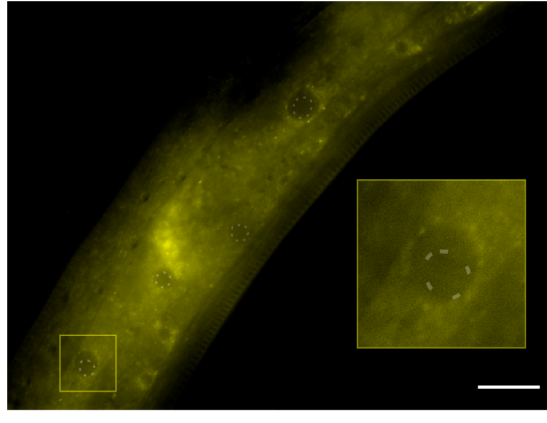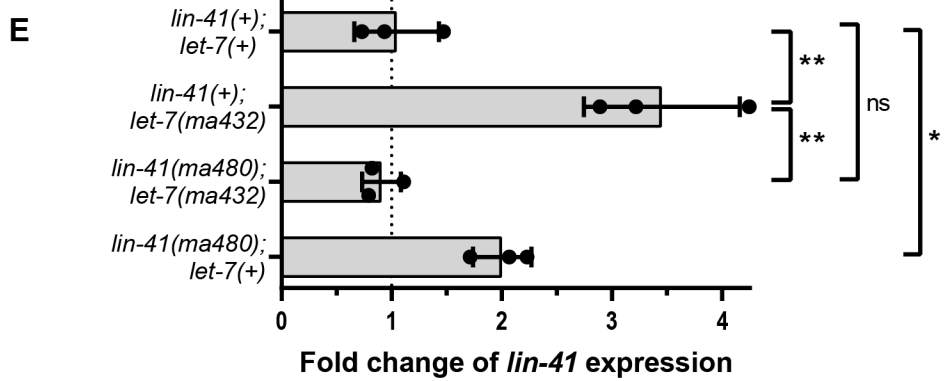

**Figure S4. Expression of LIN-41::GFP indicates that *lin-41* is a major target of *let-7a* that requires non-seed pairing.** (Related to **Figure 4**).

LIN-41 expression is visualized based on endogenous GFP-tag (*tn1541*) (Spike et al., 2014). Yellow dashed circles indicate nucleoli of Hyp7 and seam cells, which are identified using the DIC channel (middle panels) and positioned on the GFP channel image (right panels) in register with the DIC channel. The cartoons at left illustrate expected interacting configurations between *let-7a* and *lin-41* LCS1. Note that both LCSs in *lin-41* were modified using the strategy.

**A.** In WT, endogenously GFP tagged LIN-41 is expressed in neither Hyp7 nor in seam cells at the late L4 stage due to repression by *let-7a*.

**B.** In *let-7(ma432,g13)*, LIN-41 is expressed abnormally in the peri-nuclear region of both Hyp7 and seam cells due to the loss of *let-7a* repression.

**C.** In *lin-41(ma480,t13);let-7(ma432,g13)*, restoring the interacting configurations between *let-7a* and *lin-41* rescues the *let-7a* repression, thus no abnormal expression of LIN-41 was detected.

**D.** In *lin-41(ma480,t13)*, disruption of non-seed pairing to *let-7a* by mutations on the target causes de-repression of *lin-41*, resulting in abnormal expression of LIN-41::GFP similar to **(B)**.

All strains are cultured at 25 °C. Scale bars, 10 µm. All GFP images are taken with identical exposure times and microscopy settings.

**E.** Normalized expression of *lin-41* at L4 stage measured by qRT-PCR. The transcription levels were calculated by the  $\Delta\Delta C_t$  relatively to *gpd-1* and were normalized by to *lin-41(+);let-7(+)*. All strains are cultured at 25 °C. Statistical significance indicates t-test from 3 biological replicas.

Figure S5

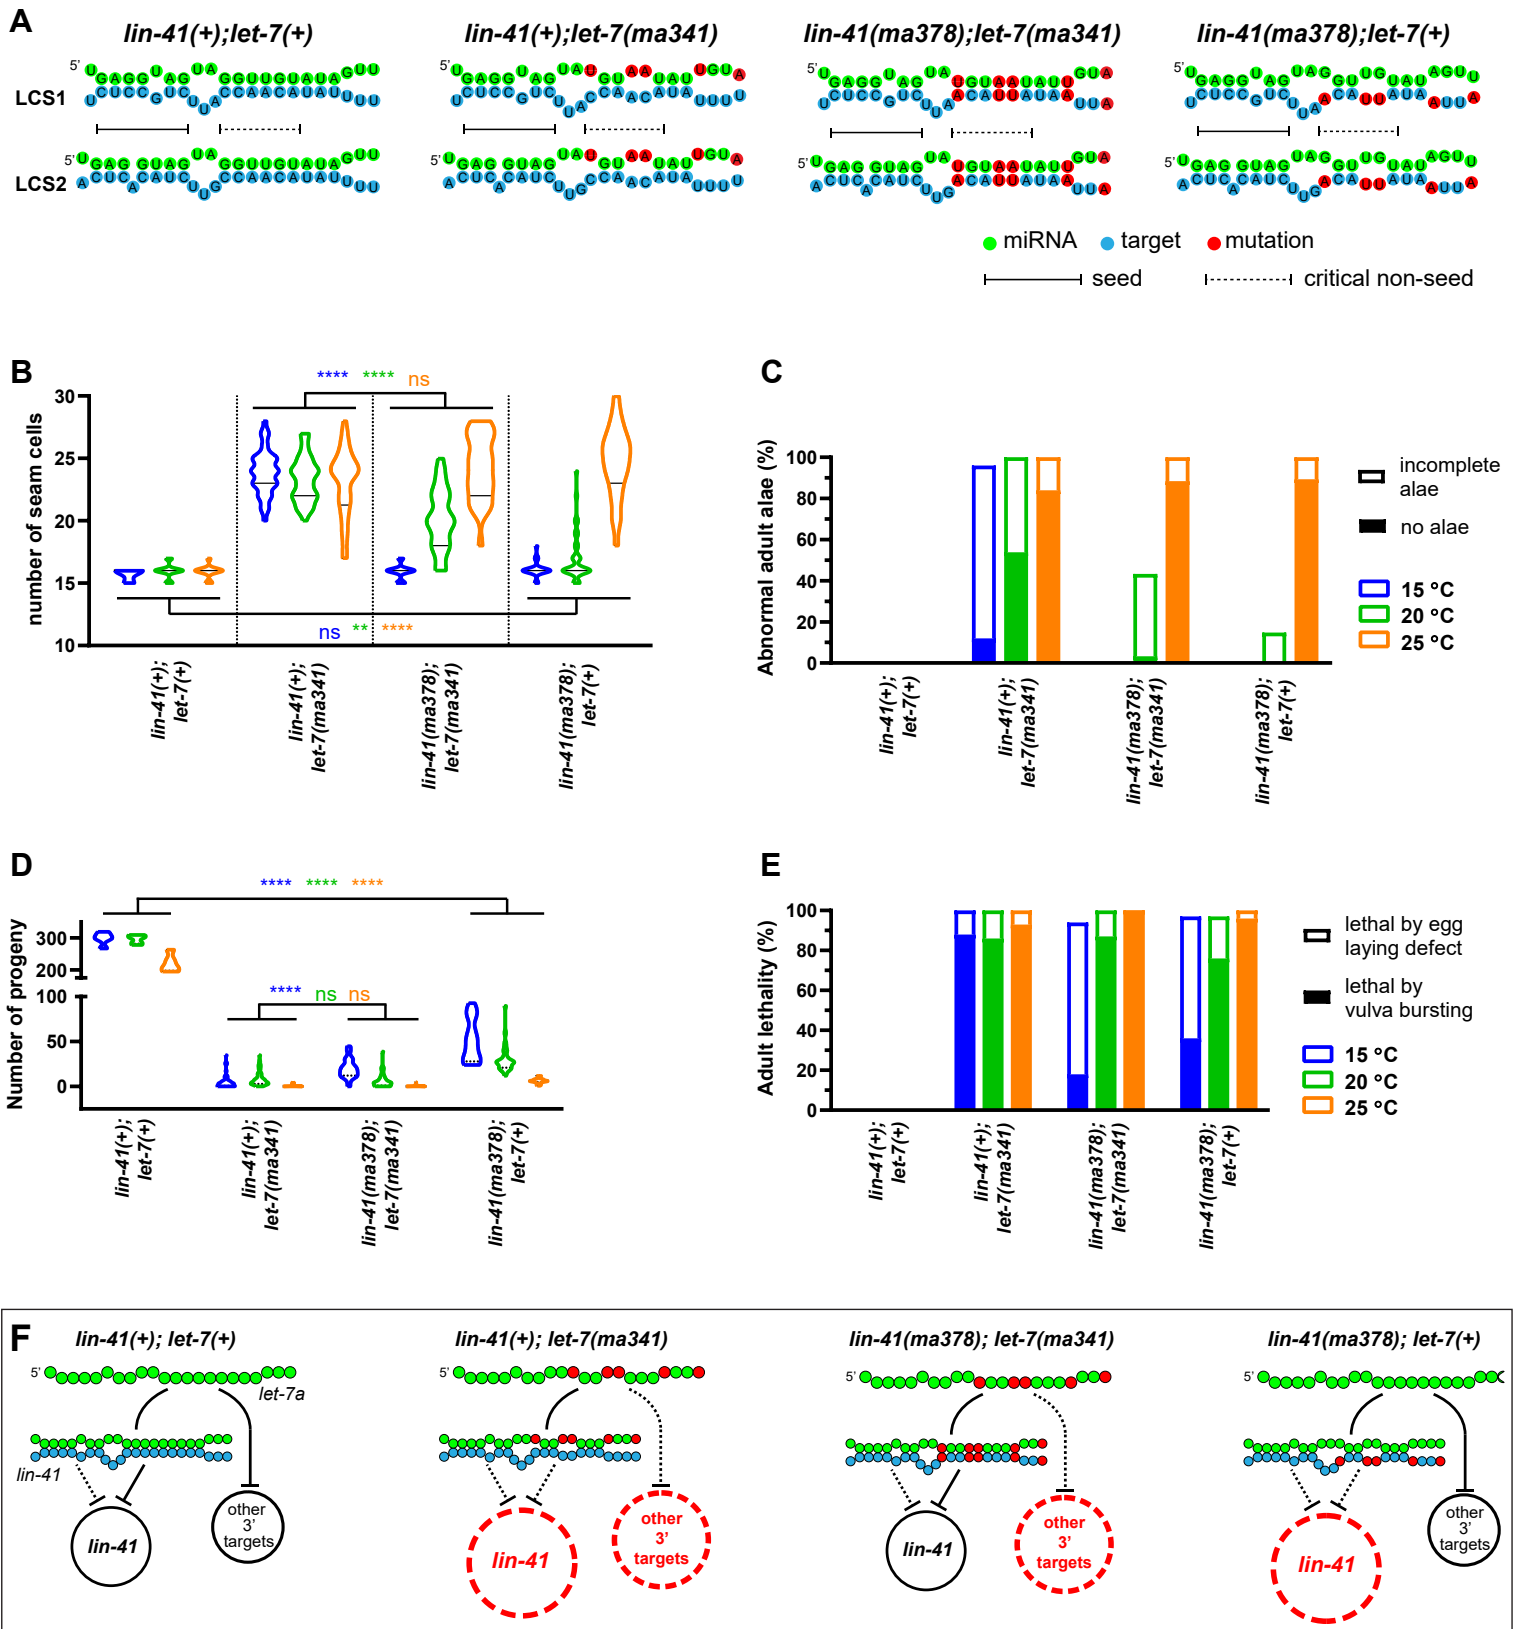



**Figure S5. *let-7a* specifically targets *lin-41* and additional 3' targets compared to the family paralogs.** (Related to **Figures 2, 4**).

**A.** Predicted pairing configurations between *let-7a* and *lin-41* LCS1/2 of WT, *let-7(ma341, mir-84 swap)*, *lin-41(ma378);let-7(ma341)* and *lin-41(ma378)*.

**B-C.** The increase in seam cell numbers of young adult animals (**B**) and the lack of normal adult alae (**C**) are characteristic of *let-7a lf* phenotypes in the heterochronic pathway. Seam cell numbers of young adults were scored using *mals105 [col-19::gfp]*.

**C.** Proportions of animals with abnormal adult alae, categorized as no alae (severe) or incomplete alae (mild).

**D-E.** Penetrance of vulva integrity defects by numbers of progeny (**D**) and adult lethality (**E**). The adult lethality is categorized as vulva bursting (severe) or egg-laying defective (mild).

**F.** Illustrative models propose that the *let-7a* 3'-sup targets additional to *lin-41* are de-repressed in *let-7a(ma341)*. The results indicate that the *lf* phenotypes of *let-7(ma341, miR-84 swap)* result from the de-repression of *lin-41* as a major effector, as well as other putative 3' targets. Thus, *let-7a* confers its functional specificity among family paralogs by regulating a multiplicity of target genes.

Figure S6

A

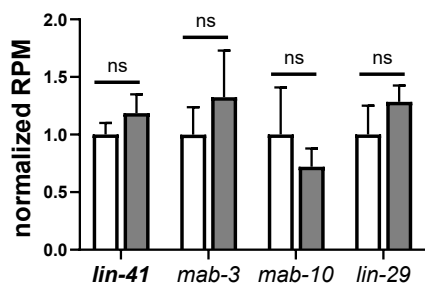

B

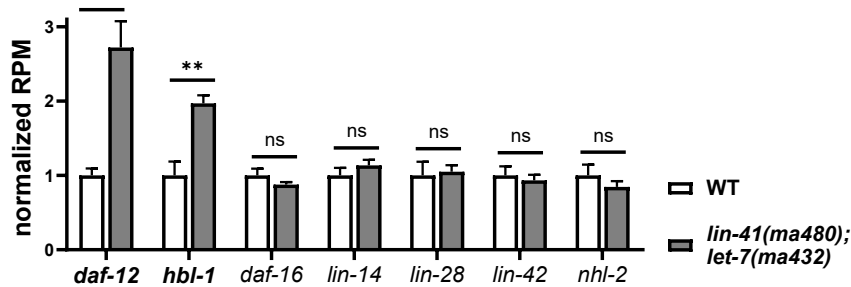

C

**daf-12**

Perfect seed + Critical non-seed pairing

[41,46]

```
mRNA  3' AACT TAC G A
        GCTCCAT TCCG CGTA CAA
miRNA  5' TGAGGTA AGGT GTAT GTT
        GT T A
```

[157,162]

```
mRNA  3' T T T T C T A A
        CTCCATC TCC AATATG
miRNA  5' GAGGTAG AGG TTGTAT
        T T AGTT
```

[541,546]

```
mRNA  3' T C C C G C T
        CTCCATC ATCCGACGTA TTAG
miRNA  5' GAGGTAG TAGGTTGTAT AGTT
        T
```

Perfect seed + No critical non-seed pairing

[1035,1040]

```
mRNA  3' G CGT TTT TC
        CTCCATCA TCC TATC
miRNA  5' GAGGTAGT AGG ATAG
        T TTGT TT
```

D

**hbl-1**

Perfect seed + Critical non-seed pairing

[266,271]

```
mRNA  3' C T CTC TC
        CTCCATC TTCA TGTC
miRNA  5' GAGGTAG AGGT ATAG
        T T TGT TT
```

[934,939]

```
mRNA  3' T T T A C T C A
        ACTCCATC TTCA GC TATCAG
miRNA  5' TGAGGTAG AGGT TG ATAGTT
        T
```

[1204,1209]

```
mRNA  3' C T TA CA
        CTCCATC TCCG ATATGTC
miRNA  5' GAGGTAG AGGT TGTATAG
        T T
```

[1247,1252]

```
mRNA  3' T C T A A T T
        ACTCCATC TTTA CAT
miRNA  5' TGAGGTAG AGGT GTA
        T T TAGTT
```

Imperfect seed + Critical non-seed pairing

[40,46]

```
mRNA  3' G C CC CCCT C
        CT CCATT CCGATA TCA
miRNA  5' GA GGTAG GGTGT AGT
        T TA AT T
```

[349,355]

```
mRNA  3' T GT TTACT
        ACTC CAT TTTGACAT
miRNA  5' TGAG GTA AGGTGTA
        GT TAGTT
```

[1288,1292]

```
mRNA  3' A C TTG T
        ACTCCA C CCAACATATTA
miRNA  5' TGAGGT G GGTGTATAGT
        A TA
```

Perfect seed + No critical non-seed pairing

[229,234]

```
mRNA  3' T T TT T
        CTCCATT TCT TGTC A
miRNA  5' GAGGTAG AGG ATAGT
        T T TTGT T
```

[407,412]

```
mRNA  3' C G G A C T C
        CTCCAT AT T ACATG
miRNA  5' GAGGTA TA G TGAT
        T G G T AGTT
```

E

**FC comparison**

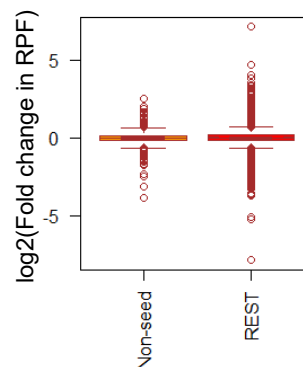

F

**mRNA abundance**

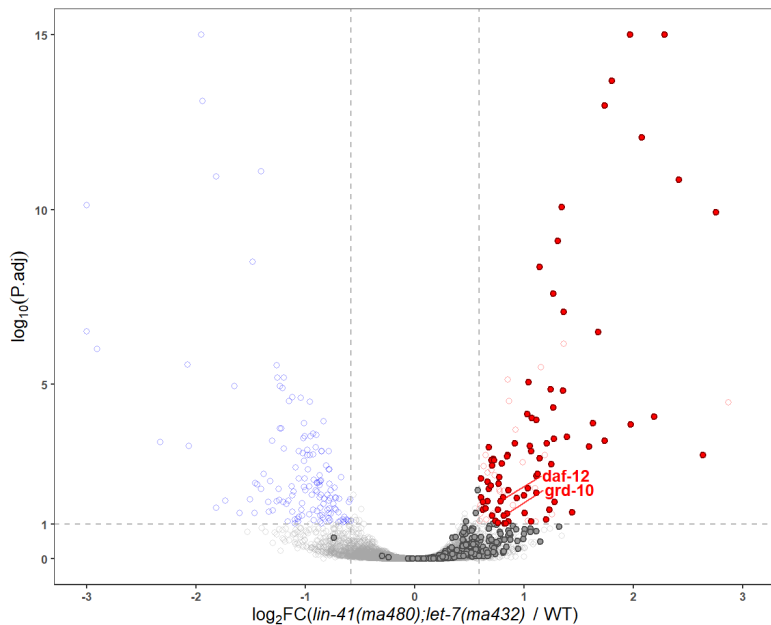

G

**Translational Efficiency (TE)**

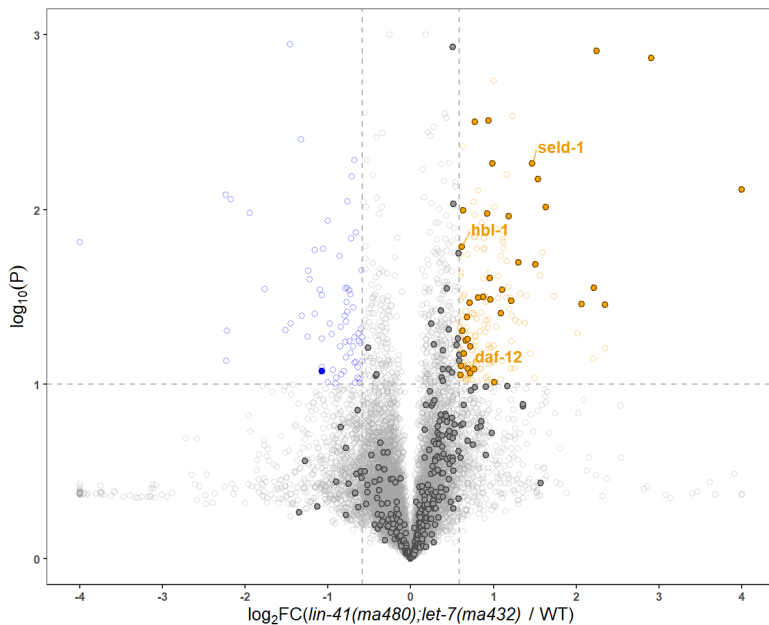

H

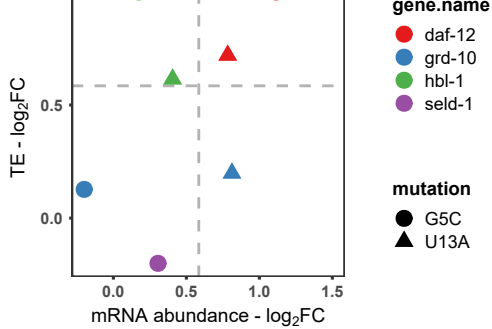

**Figure S6. Heterochronic genes *daf-12* and *hbl-1* are *let-7a* 3' targets that de-repressed in *let-7a* 3' non-seed mutant. (Related to Figures 4, 5).**

**A.** Normalized RPFs of *lin-41* and its reported direct downstream targets in WT and *lin-41(tn1541ma480);let-7(ma432)*. (Aeschimann et al., 2017). The results further support that repression of *lin-41* has been rescued by restoring the native *let-7a:lin-41* LCSs interacting configuration in Fig. 4. Note that another reported *lin-41* target *dmd-3* is excluded for this analysis due to its low read counts. Significance is evaluated by DESeq2 (Love et al., 2014).

**B.** Normalized RPFs of *C.elegans* critical heterochronic genes, including *daf-12* and *hbl-1*, in WT and *lin-41(tn1541ma480);let-7(ma432)*. Significance is evaluated by DESeq2 (Love et al., 2014).

**C-D.** Predicted base pairing configuration between *let-7a* and the predicted LCSs of *daf-12* (**C**) and *hbl-1* (**D**) including sites with pairing in the critical non-seed region (green). The categorization of seed and non-seed types is shown in STAR-Method. Sites with “weak seed + no critical non-seed” configuration (2/3, -1) were excluded. The numbers indicate locations of the *let-7a* seed in 3' UTR. Both the interacting configurations and seed locations are further shown in Data S1 and Table S4.

**E.** A comparison of fold change (FC) in RPF levels between the genes that are classified as 3'-sup targets (Non-seed) and other genes (REST). Wilcoxon rank test (`wilcox.test` in R) confirmed that the difference between the two groups is insignificant. We reason that the lack of enrichment of 3' targets among the overexpressed genes was due to the possible scenario that these 3' targets are de-repressed in specific tissues/cells, likely where *let-7a* is highly expressed, while the RPFs in the Ribo-seq were collected from whole animals, thus signals of the significant over-expression of *let-7a* targets in *let-7a*-expressing tissues are diluted. We suggest translational profiles at single-cell resolution to be taken to further investigate the above issue.

**F-G.** Categorization of the repressing mechanisms of *let-7a* non-seed region, shown by volcano plots of the differential expression analysis of RNA-seq (**F**) and TE (**G**) between *lin-41(tn1541ma480);let-7(ma432)* and *lin-41(tn1541)*. Significantly increased/decreased genes (FC > |1.5| and P.adj < 0.1 by DESeq2 (**F**) or P < 0.1 by t-test (**G**)) are colored red/blue. Solid points of both plots represent genes with significantly increased RPFs in ribosome profiling in Figure 5, among which genes with predicted *let-7a* non-seed sites are labeled with gene names.

**H.** Comparison of de-repressing models of the predicted *let-7a* 3' targets in U13A mutant (this study) and in G5C seed mutant (Aeschimann et al. 2017). RPFs and RNA-seq reads at 28-32 hrs from Aeschimann et al. 2017 were used to calculate the fold changes in TE and RNA abundance.

Figure S7

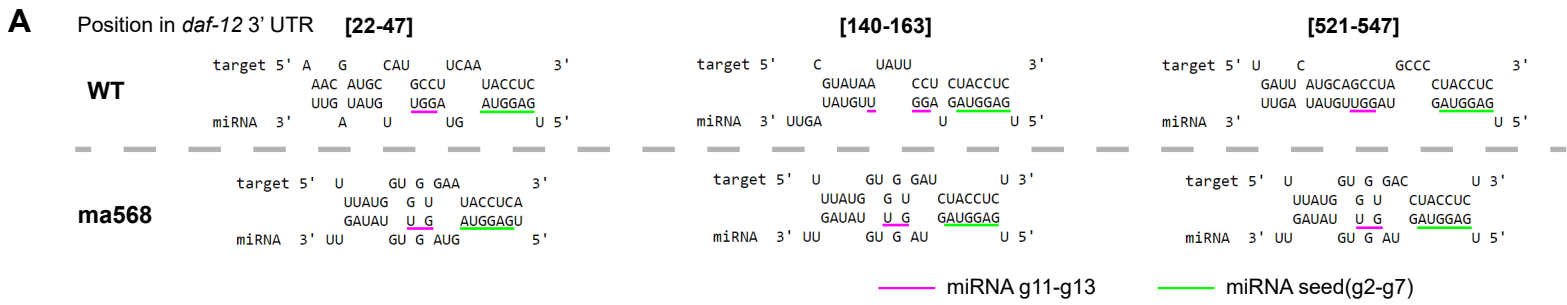

**B** Raw DAF-12 expression in Hyp7 cells

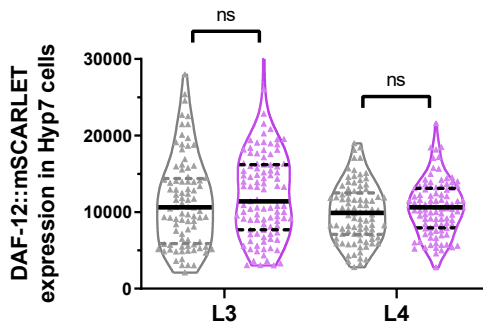

**C** Raw DAF-12 expression in seam cells

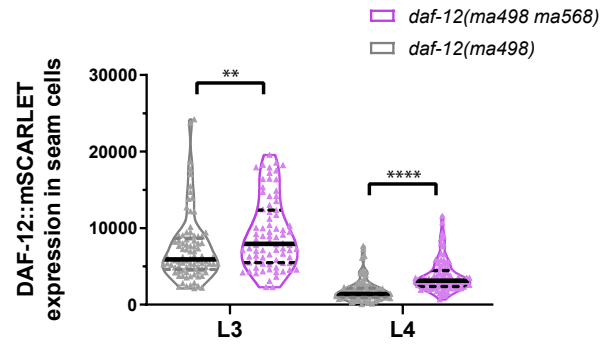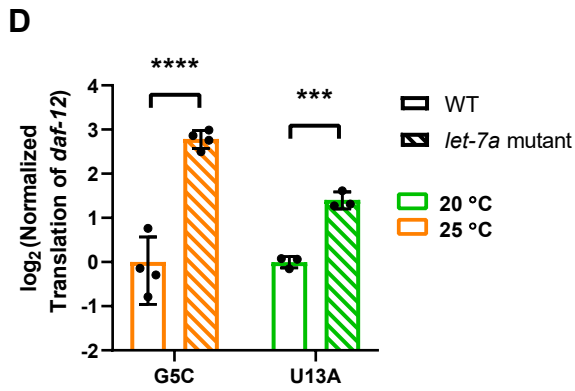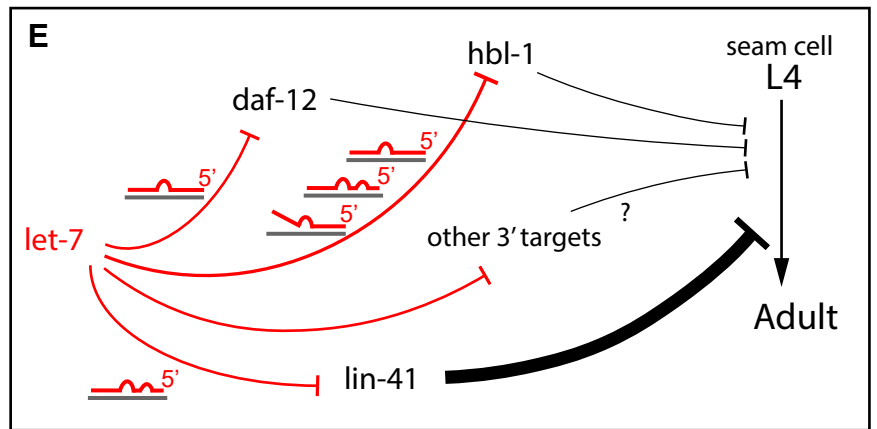

**Figure S7. *daf-12* is repressed by *let-7* family miRNAs at different developmental stages with distinct pairing configuration and repressing effect.** (Related to **Figure 5**).

**A.** Base pairing configurations between *let-7a* (miRNA) and the LCSs in *daf-12* 3' UTR which contain 3' pairing at g11-g13 in WT (target). The seed positions in 3' UTR corresponds to those in Data S1.

**B-C.** The DAF-12::mSCARLET fluorescent intensity at the L3/L4 stage, in Hyp7 nuclei (**B**) and seam cell nuclei (**C**). These values were used to calculate the normalized expression in Figure 5F. The fluorescent intensity per cell was quantified as the product of the area of the nucleus (determined in the register of the DIC channel) and the relative mean density; the latter was calculated by removing the average mean density of surrounding regions from the raw mean density of the nucleus region.

**D.** Translational expression levels of *daf-12* in *let-7(n2853, G5C)* and *lin-41(tn1541ma480);let-7(ma432, U13A)* at L4 stages. Data of *lin-41(tn1541ma480);let-7(ma432)* were obtained from Figure 5A and normalized to *lin-41(tn1541)*. Data of *let-7(n2853, G5C)* were obtained from (Aeschmann et al., 2017) at time points 26-32 hrs and normalized to N2. Note that data for the G5C mutant was obtained at 25 °C, and data of the U13A mutant was obtained at 20 °C.

**E.** Illustrative model for the genetic interactions of *let-7a* with heterochronic pathway genes, and the corresponding base pairing patterns. Red lines indicate the repressive effect of *let-7a*. Black lines indicate the genetic regulation to the L4-to-adult, whereas the line thickness indicates estimated regulation efficacy.
